# Supplementary material for: Gene Promoter-Methylation Signature as Biomarker to Predict Cisplatin-Radiotherapy Sensitivity in Locally Advanced Cervical Cancer
Source: PubMed Central journal article supplement (PMC8963763; doi:10.3389/fonc.2022.773438), 2022-03-03
Supplement: DataSheet_1.pdf [file DataSheet_1.pdf]

*Supplementary Material*

**Supplementary Figure 1**

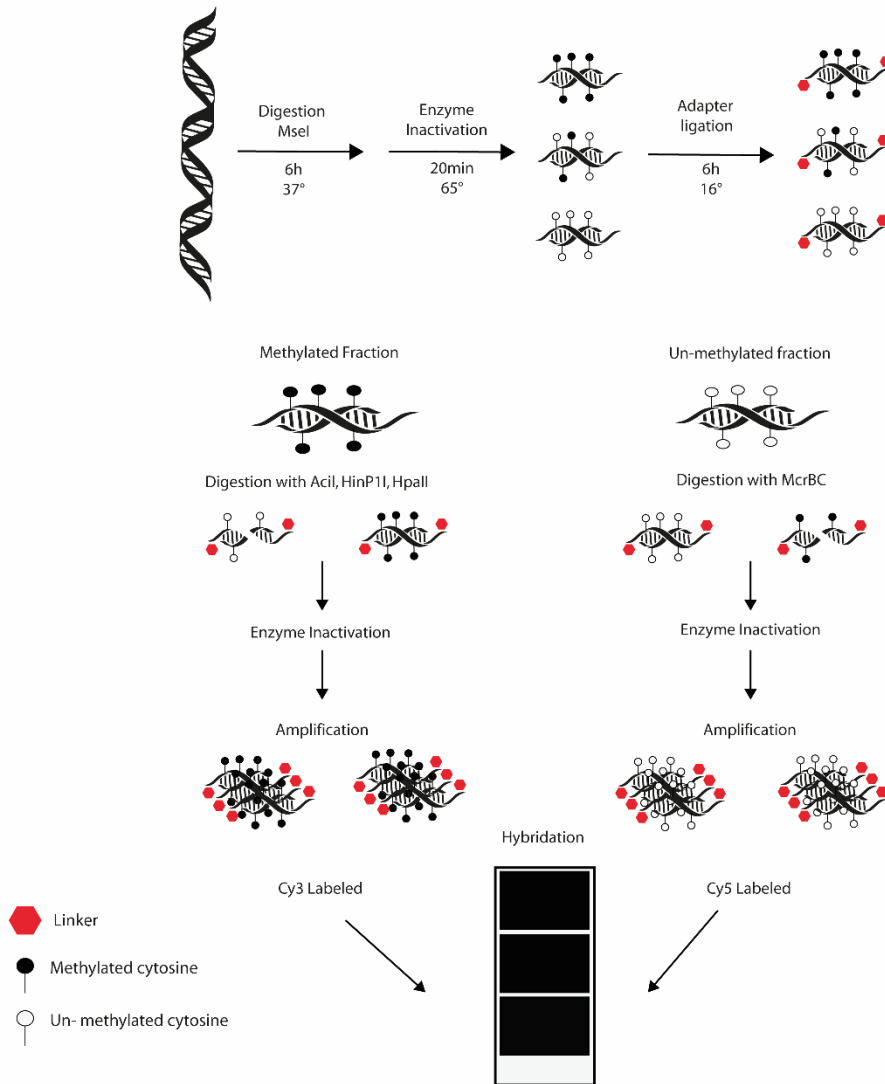

**Supplementary Figure 1.** Flowchart and method performance to aPRIMES assay

**Supplementary Figure 2**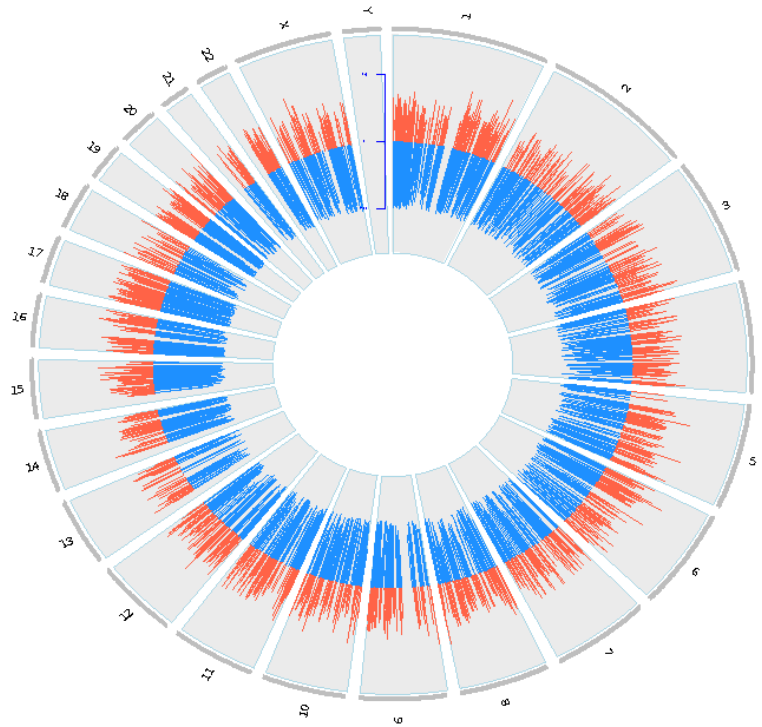

**Supplementary Figure 2.** Circos plot representing the differentially methylated regions across the genome in cervical cancer patients. The blue inner ring represents the bi-weight of the significant methylated regions, meanwhile red outer ring shows hypermethylated chromosome areas.

**Supplementary Figure 3**

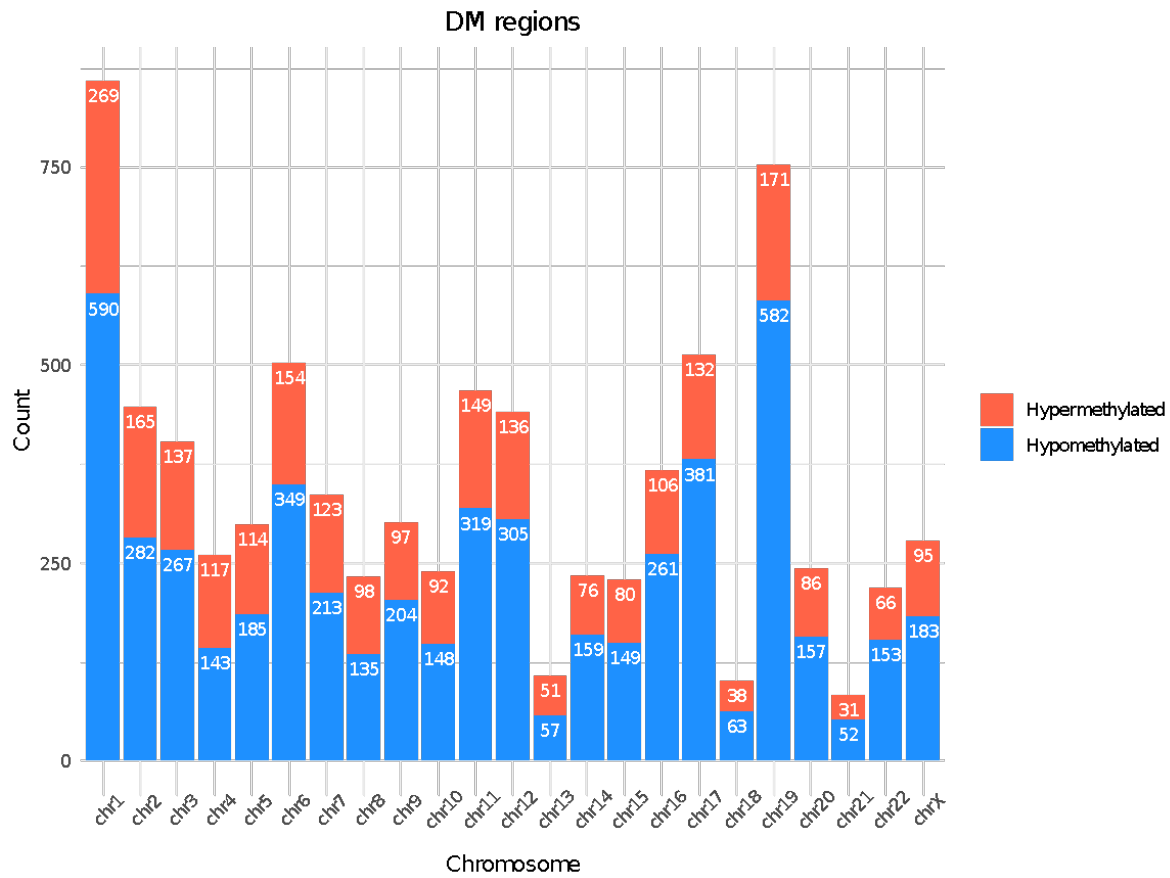

**Supplementary Figure 3.** Number of regions differentially methylated across the genome. The barplot represents the number of regions differentially methylated per chromosome where light blue shows hypermethylated regions and dark blue hypomethylated.

**Supplementary Table 1. MSP primers.**

| <b>Gene</b>  |    | <b>Methylated</b>         | <b>Un-methylated</b>         |
|--------------|----|---------------------------|------------------------------|
| <b>BRD9</b>  | Fw | GAATTTTTATTAGGAACGTAAGCG  | GAATTTTTATTAGGAATGTAAGTG     |
|              | Rv | CTACGAAAATAAAACGACGACG    | TCCTACAAAATAAAACAACAACAC     |
| <b>CTU1</b>  | Fw | CGAGTAGTTGGGATTATAGGTTTAC | TTTTGAGTAGTTGGGATTATAGGTTTAT |
|              | Rv | AAAAAATCTAAAAAAAACGCGAA   | ATCAAAAATCTAAAAAAAACACAAA    |
| <b>DOCK8</b> | Fw | AGTTTAGCGTTGGTGTGAAGC     | GATAGTTTAGTGTGGTGTGAAGTG     |
|              | Rv | GAAACGAACGAAATTATTCGAAA   | ACAAAACAAACAAAATTATTCAAAA    |
