# Supplementary material for: Gene Promoter-Methylation Signature as Biomarker to Predict Cisplatin-Radiotherapy Sensitivity in Locally Advanced Cervical Cancer
Source: Front Oncol. 2022 Mar 3;12:773438. doi: 10.3389/fonc.2022.773438 (PMC8963763; doi:10.3389/fonc.2022.773438)
Supplement: Supplementary file 2 [file Table_1.xlsx]

## Sheet: Hoja1
FILE NUMBER	AGE	HISTOLOGIC	CLINICAL STAGE	RESPONSE	HPV Genotipe	tumor size cm
104657	63	EPIDERMOID	2	CR	16	6
110124	54	EPIDERMOID	2	CR	16	5
104492	60	EPIDERMOID	2	CR	16	4
104435	29	EPIDERMOID	2	CR	16	2
103805	57	EPIDERMOID	3	CR	18	7
102736	43	EPIDERMOID	2	CR	52	7
104659	62	EPIDERMOID	2	CR	16	4
103713	35	EPIDERMOID	2	CR	18	5
104616	46	EPIDERMOID	2	CR	16	6
112779	38	EPIDERMOID	3	CR	16	5
111430	43	EPIDERMOID	3	CR	16	5
111833	57	EPIDERMOID	2	CR	58	5
114830	63	EPIDERMOID	2	CR	16
114847	68	EPIDERMOID	2	CR	16	3
115654	55	EPIDERMOID	2	CR	52	2
114826	41	EPIDERMOID	2	CR	16	3
109311	37	EPIDERMOID	3	CR	52	3
115467	43	EPIDERMOID	2	CR	16	3
115338	44	ADENOCARCINOMA	2	CR	16	3
115593	*	EPIDERMOID	2	CR	58	3
110667	46	EPIDERMOID	3	CR	16	4
116718	44	EPIDERMOID	3	CR	16	5
116479	62	EPIDERMOID	2	CR	52	3
127837	49	EPIDERMOID	2	CR	16	4
108911	*	EPIDERMOID	3	CR	18	5
109311	37	EPIDERMOID	3	CR	52	3
114826	53	EPIDERMOID	2	CR	58	5
115593	59	EPIDERMOID	2	CR	16
115874	52	EPIDERMOID	2	CR	16	2
117197	*	EPIDERMOID	3	CR	18
117253	45	EPIDERMOID	3	CR	18	4
118328	74	EPIDERMOID	3	CR	18	5
119755	55	EPIDERMOID	3	CR	16	3
115659	*	EPIDERMOID	2	CR	16
128863	69	ADENOCARCINOMA	2	CR	58	2
128458	56	EPIDERMOID	2	CR	16	5
112544	43	EPIDERMOID	2	CR	16	4
160284	64	EPIDERMOID	2	CR	16	3
132054	39	EPIDERMOID	2	CR	16	4
130776	40	ADENOCARCINOMA	2	CR	16	3
116622	70	EPIDERMOID	2	CR	16	3
128518	38	EPIDERMOID	2	CR	18	5
126495	57	EPIDERMOID	2	CR	6	2
127837	49	EPIDERMOID	2	CR	16	3
128905	53	EPIDERMOID	2	CR	18	4
113218	61	ADENOCARCINOMA	2	CR	16	3
115980	31	EPIDERMOID	2	CR	18	2
115913	74	EPIDERMOID	2	CR	18	5
132164	*	EPIDERMOID	2	CR	6
131173	66	EPIDERMOID	2	CR	58	3
131831	79	ADENOCARCINOMA	2	CR	16	6
116067	37	EPIDERMOID	2	CR	16	5
103779	48	EPIDERMOID	3	TR	(-)	7
93182	49	ADENOCARCINOMA	2	TR	59	5
111445	41	EPIDERMOID	2	TR	59	5
110139	36	EPIDERMOID	3	TR	16	5
111265	50	EPIDERMOID	3	TR	33	6
103238	44	EPIDERMOID	2	TR	16	9
102473	32	EPIDERMOID	2	TR	58	4
103682	51	EPIDERMOID	3	TR	6	7
102062	47	EPIDERMOID	2	TR	16	7
101598	31	EPIDERMOID	2	TR	16	7
115171	31	EPIDERMOID	3	TR	16	3
112749	44	EPIDERMOID	3	TR	18	3
108911	56	EPIDERMOID	3	TR	16	3
115226	59	EPIDERMOID	4	TR	18	5
116330	47	EPIDERMOID	4	TR	18	4
126137	61	EPIDERMOID	4	TR	18	4
125921	74	ADENOCARCINOMA	2	TR	52	2
115051	46	EPIDERMOID	3	TR	16	3
160084	58	EPIDERMOID	3	TR	16	6
118400		EPIDERMOID	3	TR	16
120266	76	EPIDERMOID	4	TR	52	4
109361	53	EPIDERMOID	2	TR	16	6
113255	51	EPIDERMOID	2	TR	18
117811	63	EPIDERMOID	4	TR	18	6
118777	71	EPIDERMOID	3	TR	18	5
130774	51	EPIDERMOID	2	TR	16	5
125498	46	EPIDERMOID	4	TR	16	6
119755	55	EPIDERMOID	4	TR	18	7
162909	53	EPIDERMOID	3	TR	18	5
154559	34	EPIDERMOID	3	TR	18	6
131328	29	EPIDERMOID	2	TR	16	4
130774	51	ADENOCARCINOMA	2	TR	16	6
125498	46	EPIDERMOID	4	TR	16
127036	49	EPIDERMOID	4	TR	16	4
114335	44	EPIDERMOID	3	TR	52	3
131159	57	EPIDERMOID	2	TR	16	5
125827	31	EPIDERMOID	3	TR	18	4
120266	76	EPIDERMOID	4	TR	16	6
123375	42	EPIDERMOID	3	TR	16	3
181034	29	ADENOCARCINOMA	2	TR	18	6
